# Supplementary material for: Protein interaction map of APOBEC3 enzyme family reveals deamination-independent role in cellular function
Source: PubMed Central journal article supplement — bioRxiv. 2024 Feb 6:2024.02.06.579137. Preprint. [Version 1] doi: 10.1101/2024.02.06.579137 (PMC10871184; doi:10.1101/2024.02.06.579137), 2024-02-06

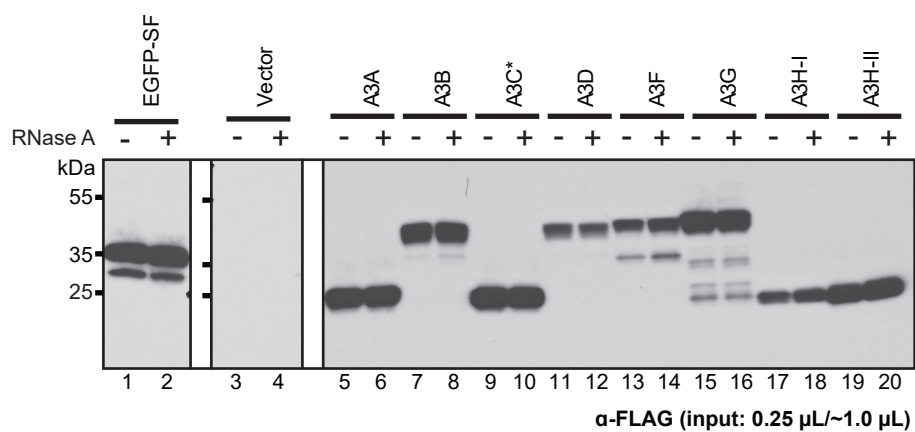

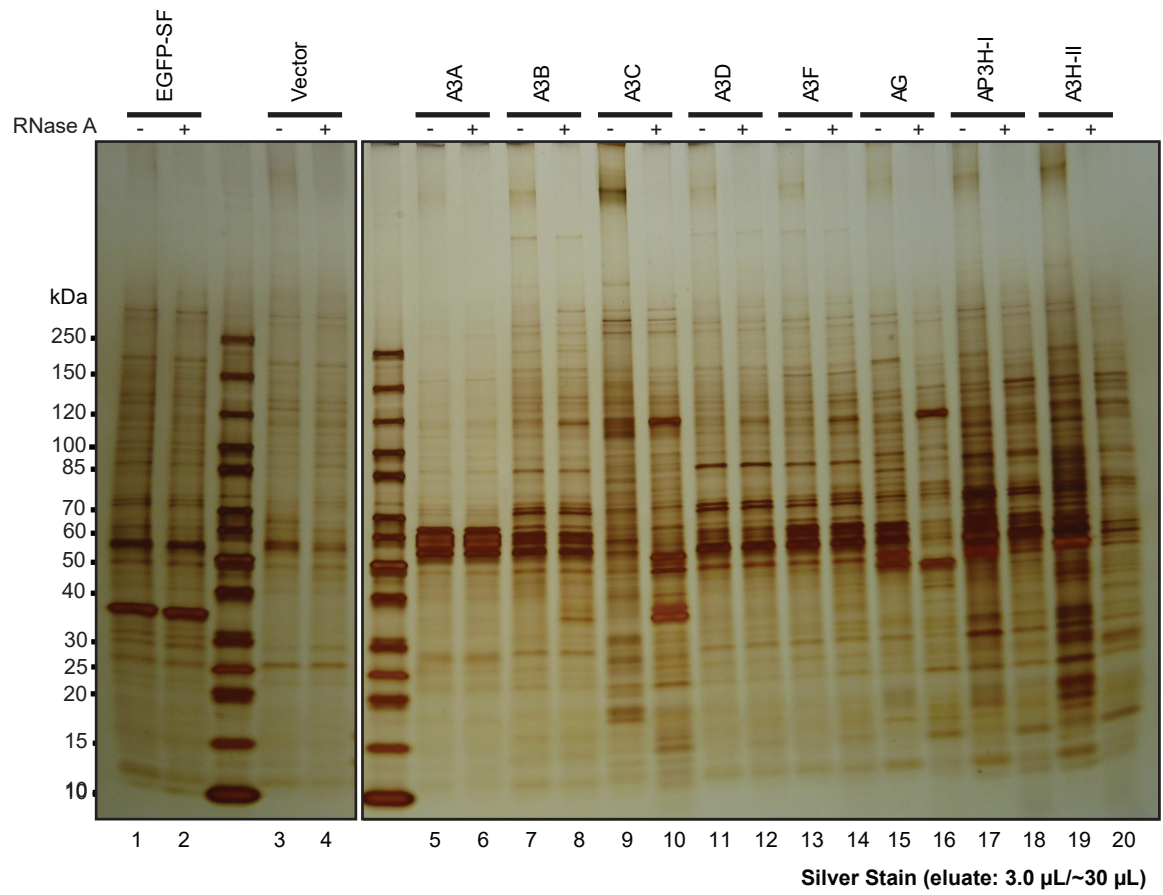

# SAINT BFDR < 0.05 Thresholded PPI Network

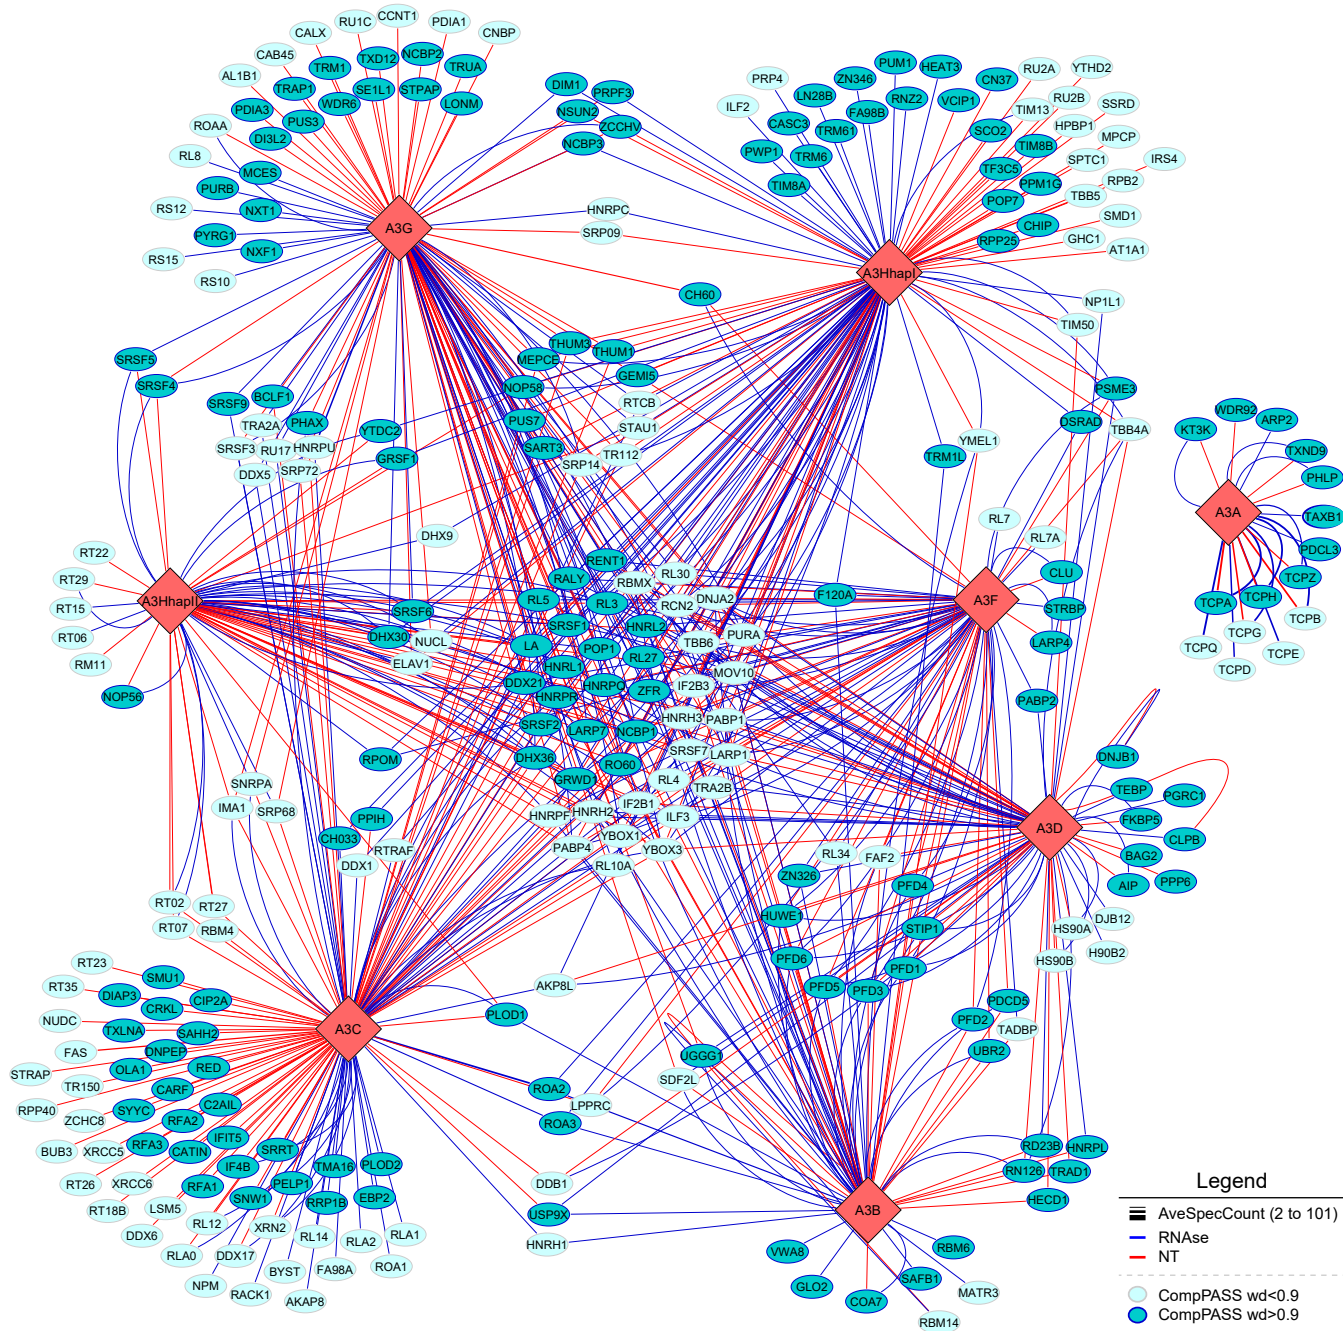

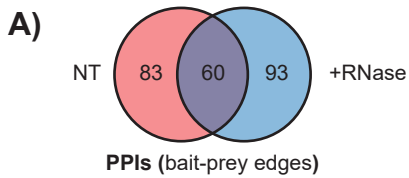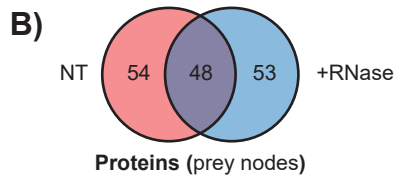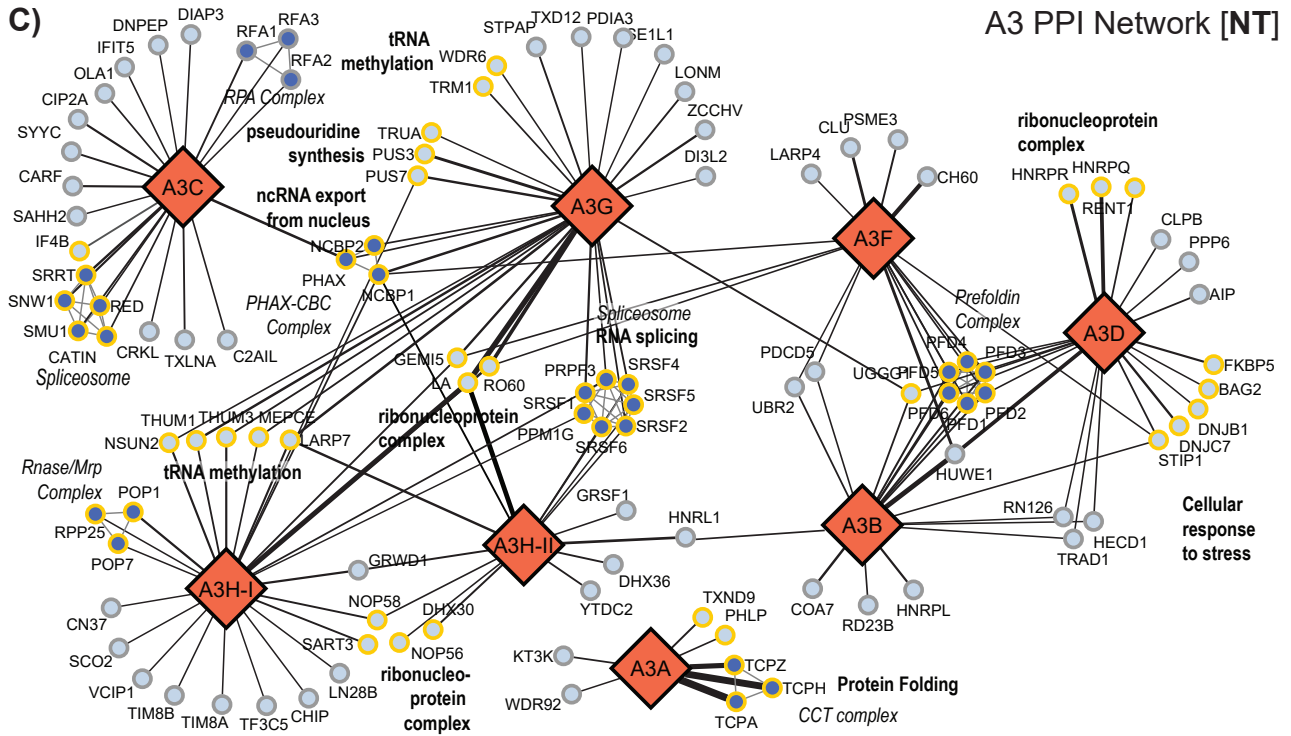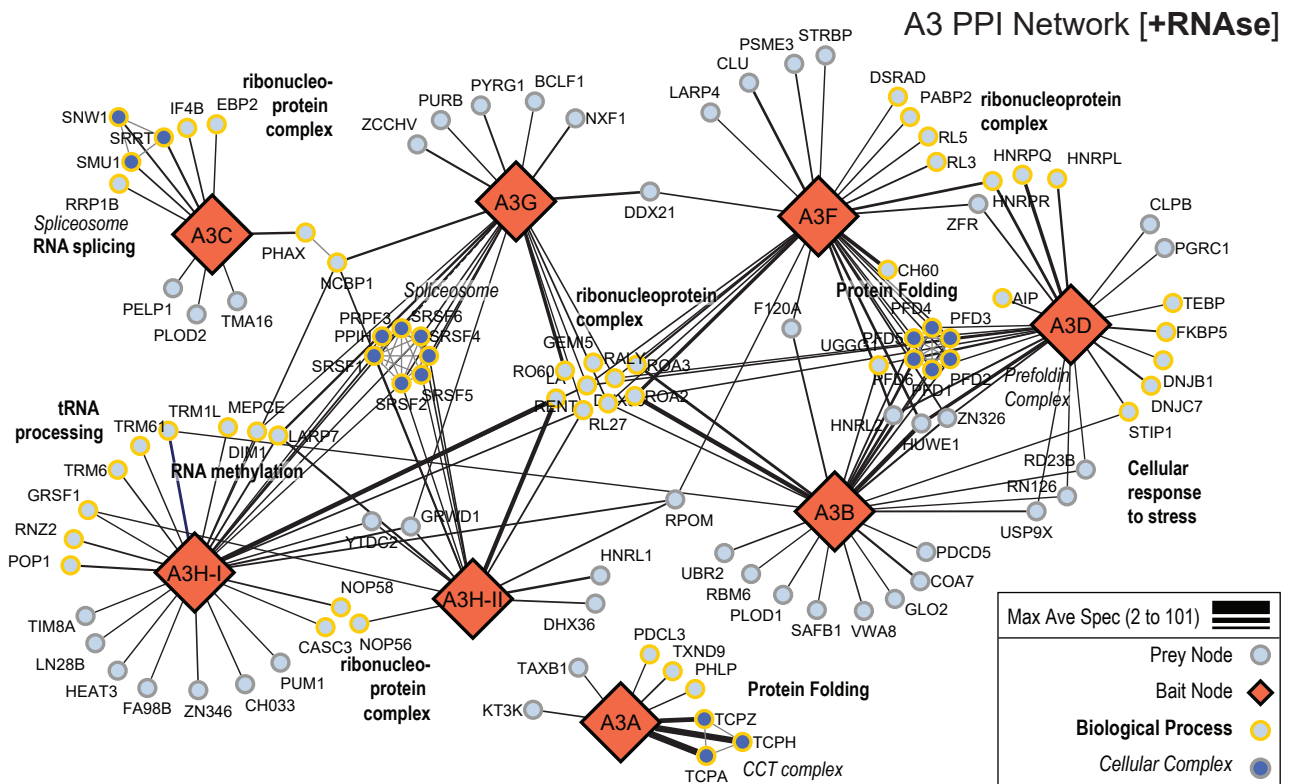

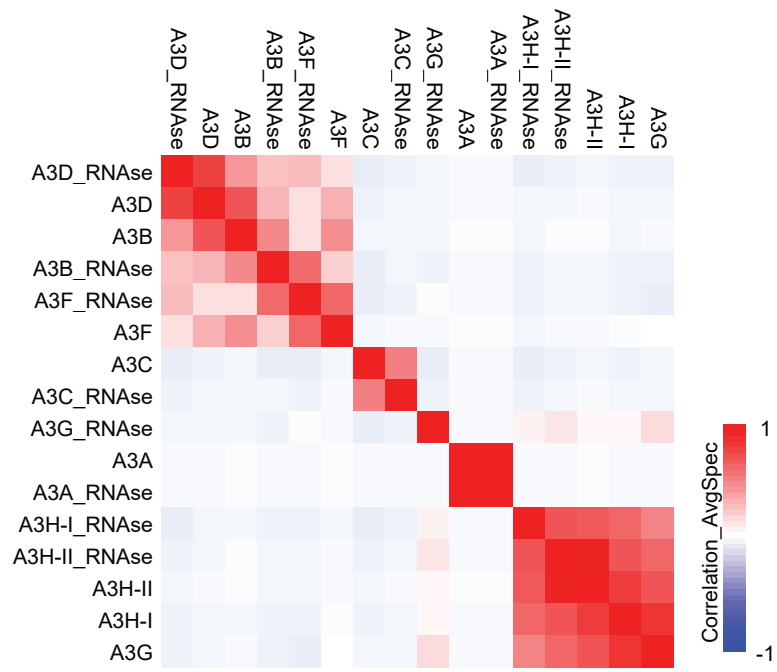

Scatter plot of DIS vs. log2FC (NT/RNase+)

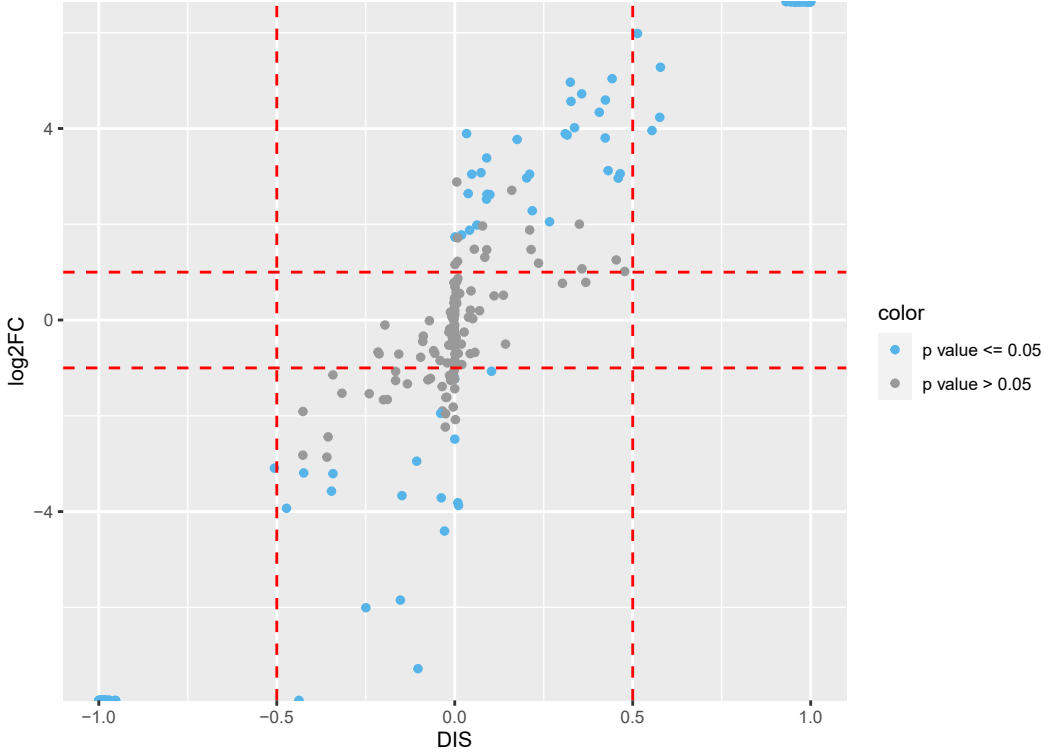

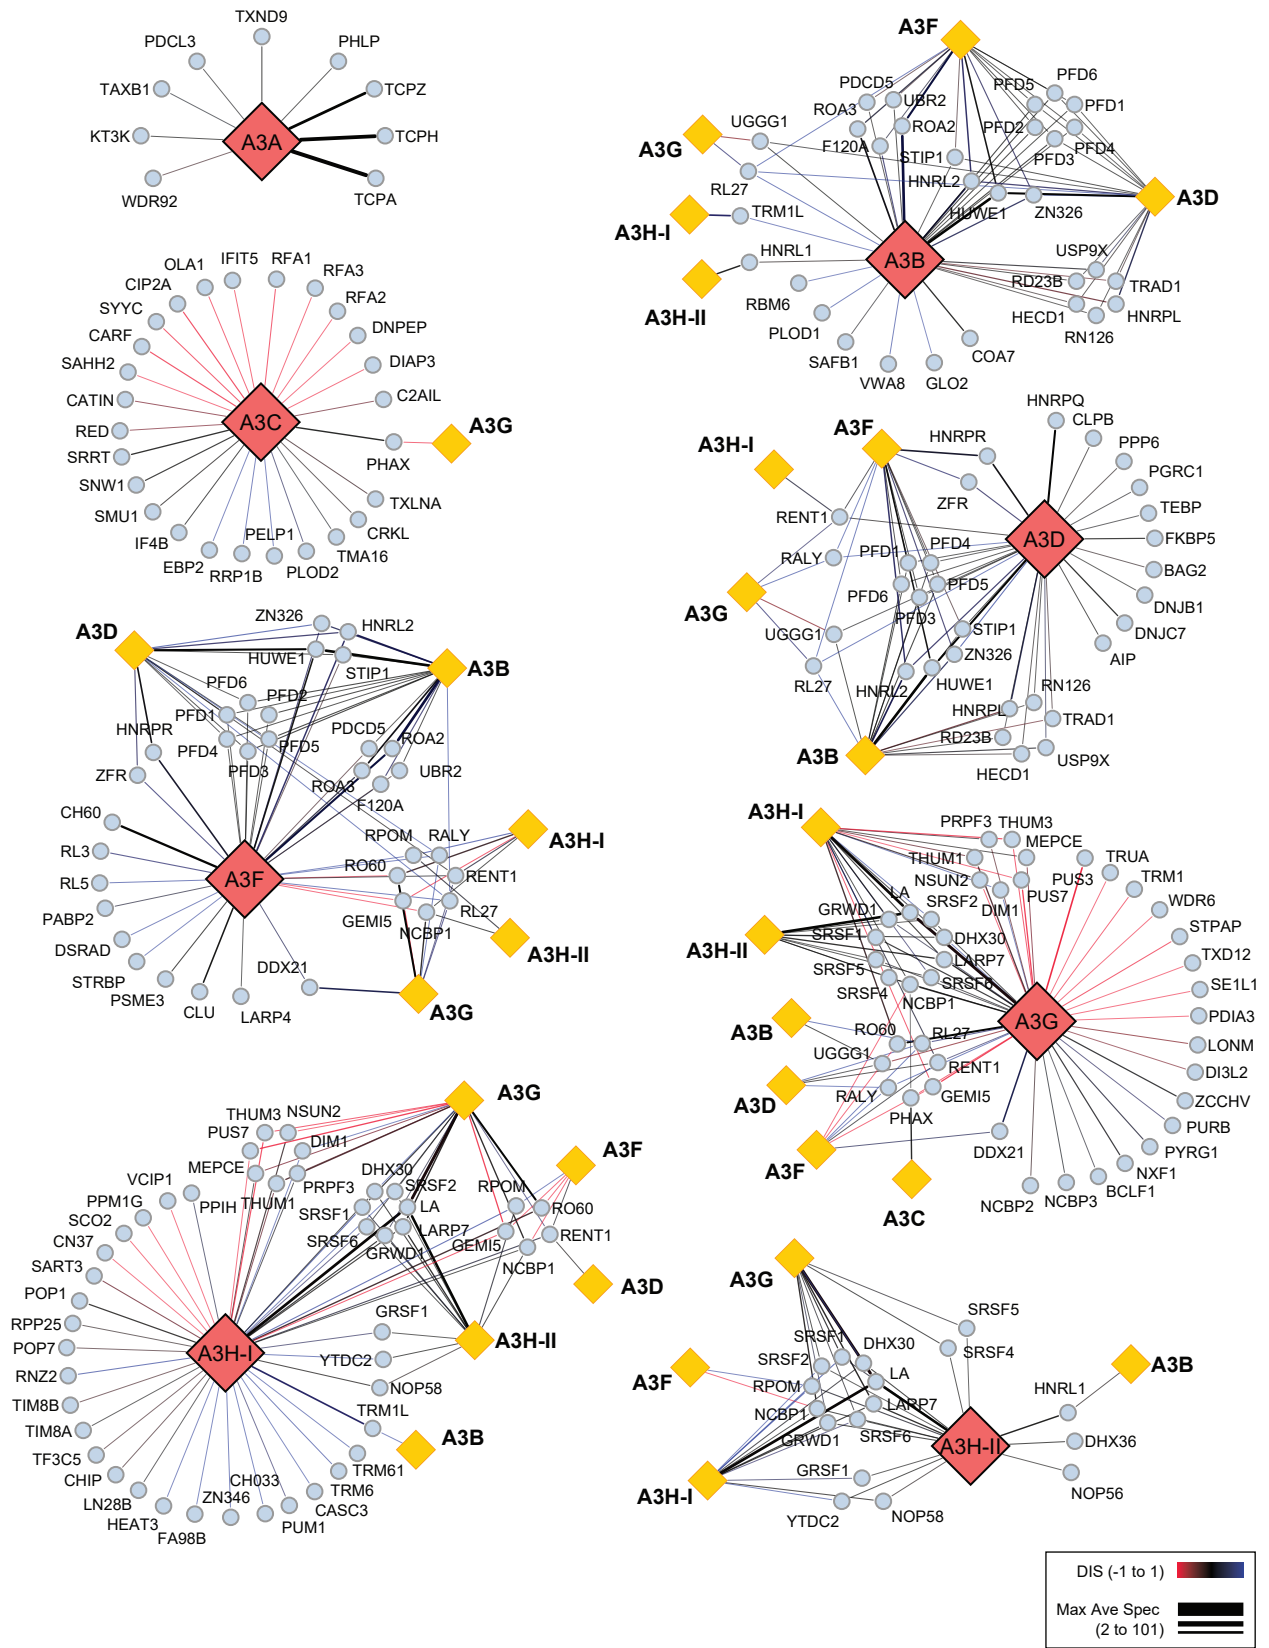

**A**

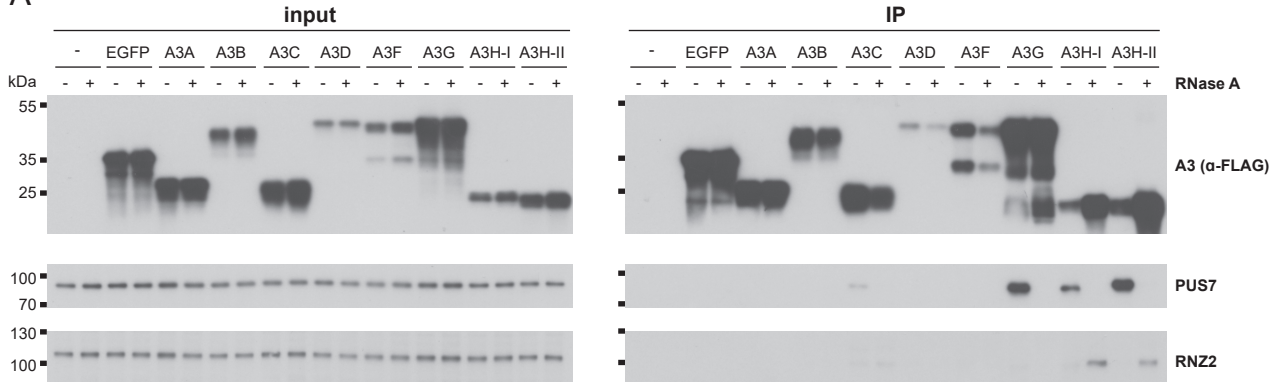

**B**

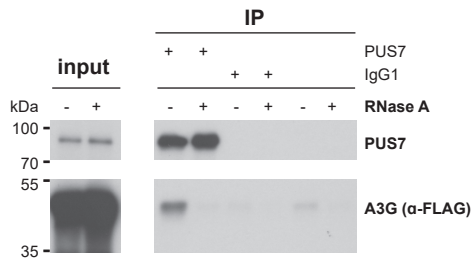



**A**

|           |   |    |    |   |    |    |
|-----------|---|----|----|---|----|----|
| A3B-HA    | - | -  | -  | - | -  | -  |
| A3D-HA    | - | -  | -  | - | -  | -  |
| A3F-HA    | - | -  | -  | - | -  | -  |
| A3G-HA    | - | -  | -  | - | -  | -  |
| PFD3-FLAG | + | -  | +  | - | +  | -  |
| PFD5-FLAG | - | +  | -  | + | -  | +  |
| RNAse A   | - | -  | -  | - | +  | +  |
| Treatment | L | IP | IP | L | IP | IP |

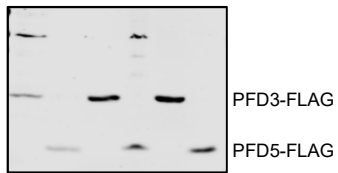**B**

|           |   |    |    |   |    |    |   |    |    |   |    |    |
|-----------|---|----|----|---|----|----|---|----|----|---|----|----|
| A3B-HA    | + | +  | +  | - | -  | -  | - | -  | -  | - | -  |    |
| A3D-HA    | - | -  | -  | + | +  | +  | - | -  | -  | - | -  |    |
| A3F-HA    | - | -  | -  | - | -  | -  | + | +  | +  | - | -  |    |
| A3G-HA    | - | -  | -  | - | -  | -  | - | -  | -  | + | +  | +  |
| PFD3-FLAG | - | -  | -  | - | -  | -  | - | -  | -  | - | -  |    |
| PFD5-FLAG | - | -  | -  | - | -  | -  | - | -  | -  | - | -  |    |
| RNAse A   | + | -  | -  | + | -  | -  | + | -  | -  | + | -  |    |
| Treatment | L | IP | IP | L | IP | IP | L | IP | IP | L | IP | IP |

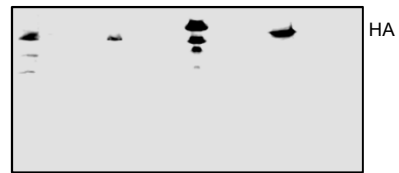

Supplement: media-1.pdf [file media-1.pdf]
